# Supplementary material for: Silver Nanowires and Silanes in Hybrid Functionalization of Aramid Fabrics
Source: MDPI journal article supplement (doi:10.3390/molecules27061952), 2022-03-17
Supplement: s1 [file s1]

Supplementary Materials

Alicja Nejman <sup>1,2</sup>, Anna Baranowska-Korczyn <sup>1</sup>, Katarzyna Ranoszek-Soliwoda <sup>2</sup>, Izabela Jasińska <sup>1</sup>,  
Grzegorz Celichowski <sup>2</sup> and Małgorzata Cieślak <sup>1,\*</sup>

<sup>1</sup> ŁUKASIEWICZ Research Network – Textile Research Institute, Brzezinska St. 5/15, 92-103 Lodz, Poland; alicja.nejman@iw.lukasiewicz.gov.pl (A.N.); anna.baranowska-korczyn@iw.lukasiewicz.gov.pl (A.B.-K.); izabela.jasinska@iw.lukasiewicz.gov.pl (I.J.)

<sup>2</sup> Department of Materials Technology and Chemistry, Faculty of Chemistry, University of Lodz, Pomorska St. 163, 90-236 Lodz, Poland; katarzyna.soliwoda@chemia.uni.lodz.pl (K.R.-S.), grzegorz.celichowski@chemia.uni.lodz.pl (G.C.)

\* Correspondence: malgorzata.cieslak@iw.lukasiewicz.gov.pl (M.C.)

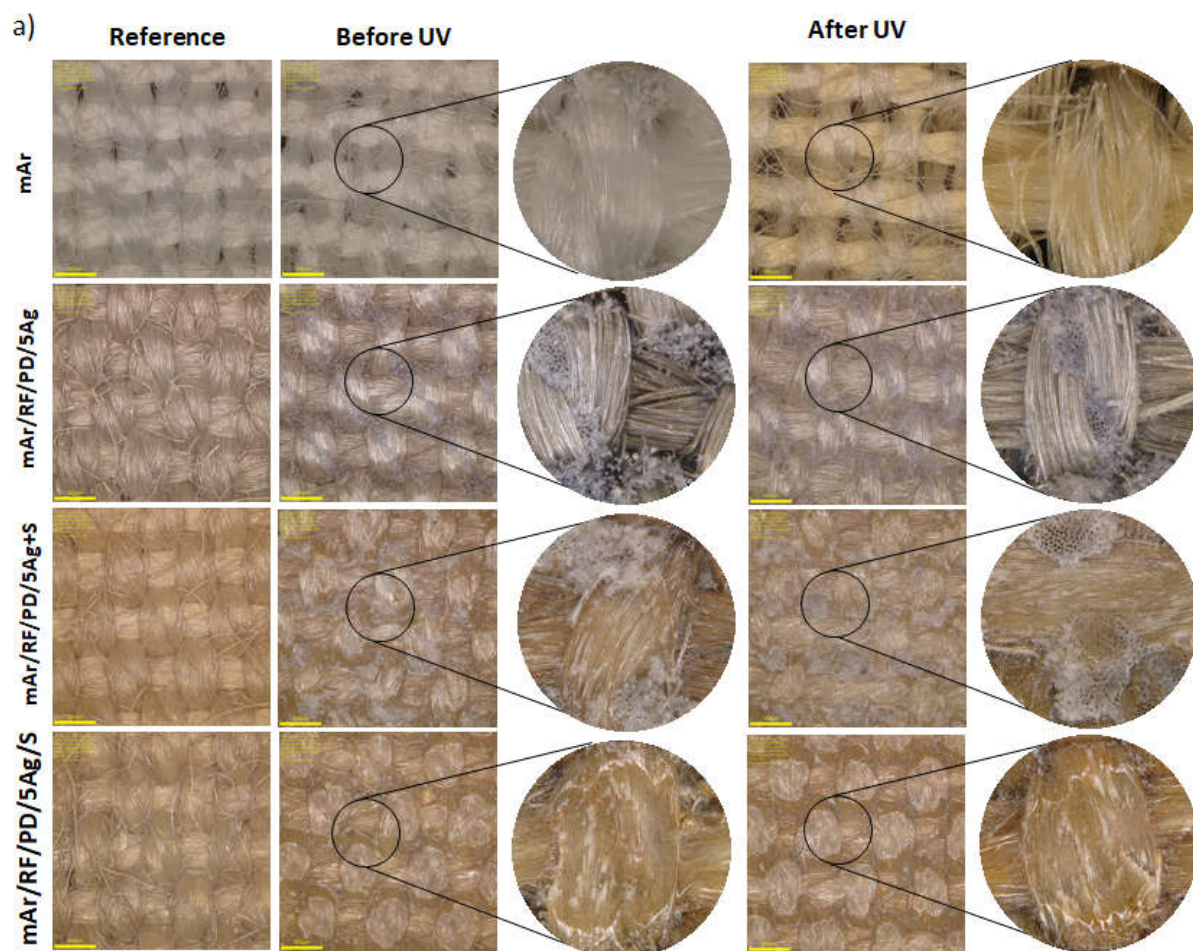

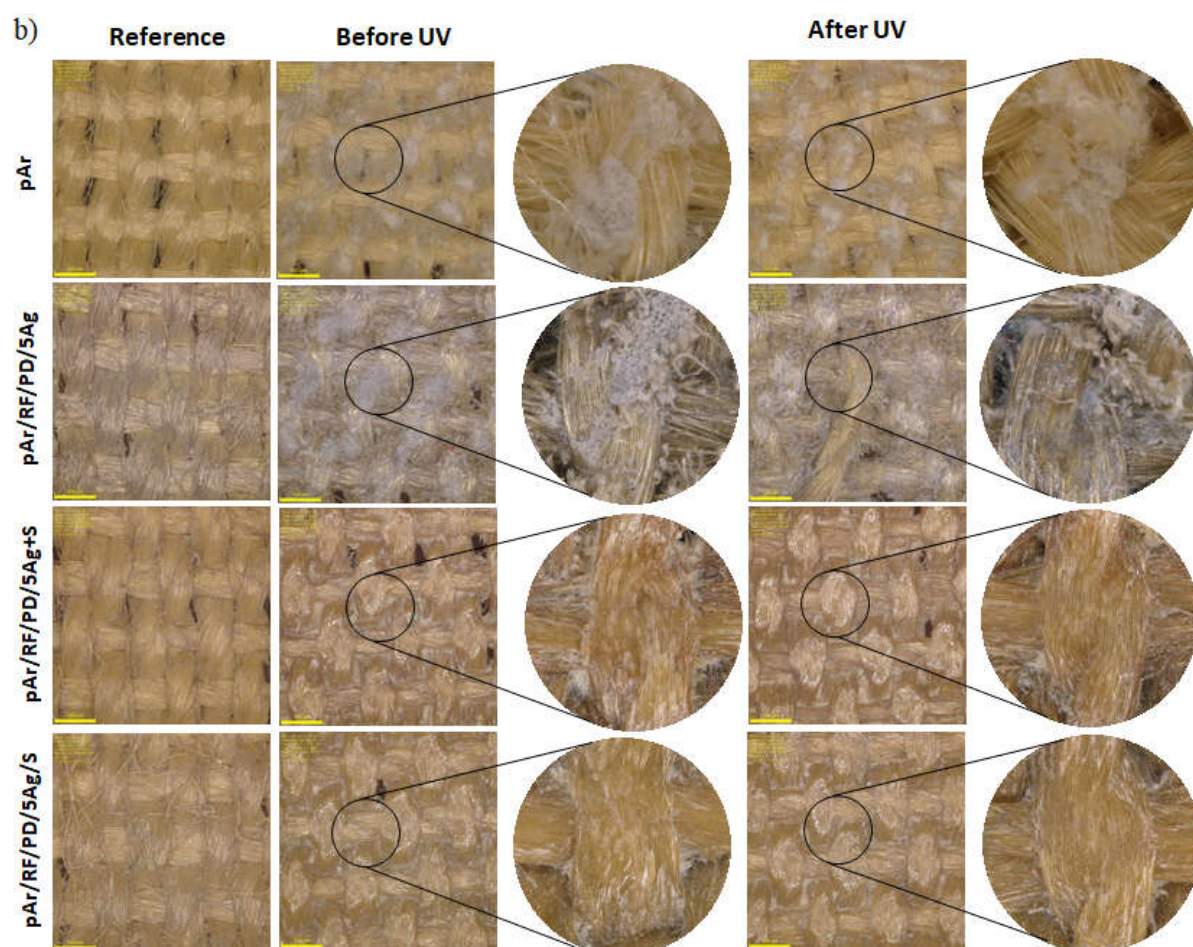

**Figure S1.** Images of (a) *m*Ar and (b) *p*Ar fabrics surfaces, before and after UV radiation (365 nm, 96 h), before and after abrasion cycles.
